# Supplementary material
Source: Research Square preprint supplement (doi:10.21203/rs.3.rs-9915535/v1)
Supplement: Supplementary file 1 [file 34ddddf4682b88c86c8acc5d.pdf]

1 Supplementary information to:

2

3 **Projection-biased dopamine neuron subpopulations coordinate**  
4 **immediate and future-oriented motivation**

5

6 Hideyuki Matsumoto<sup>1,2,\*</sup>, Kenji Mizuseki<sup>1,2,\*</sup>

7

8 <sup>1</sup>Department of Physiology, Osaka Metropolitan University Graduate School of Medicine,  
9 Osaka, 545-8585, Japan

10 <sup>2</sup>Department of Physiology, Osaka City University Graduate School of Medicine, Osaka,  
11 545-8585, Japan

12

13 \* Correspondence: [matsumoto.hideyuki@omu.ac.jp](mailto:matsumoto.hideyuki@omu.ac.jp), [mizuseki.kenji@omu.ac.jp](mailto:mizuseki.kenji@omu.ac.jp)

14

15

16 **This file contains:**

17 1. Supplementary figures and figure legends (1–12)

18 2. References (in this file)

19

20 Unless otherwise noted, box plots in the supplementary figures show the median,  
21 interquartile range (IQR), and whiskers extending to the most extreme data points within  
22  $1.5 \times \text{IQR}$ .

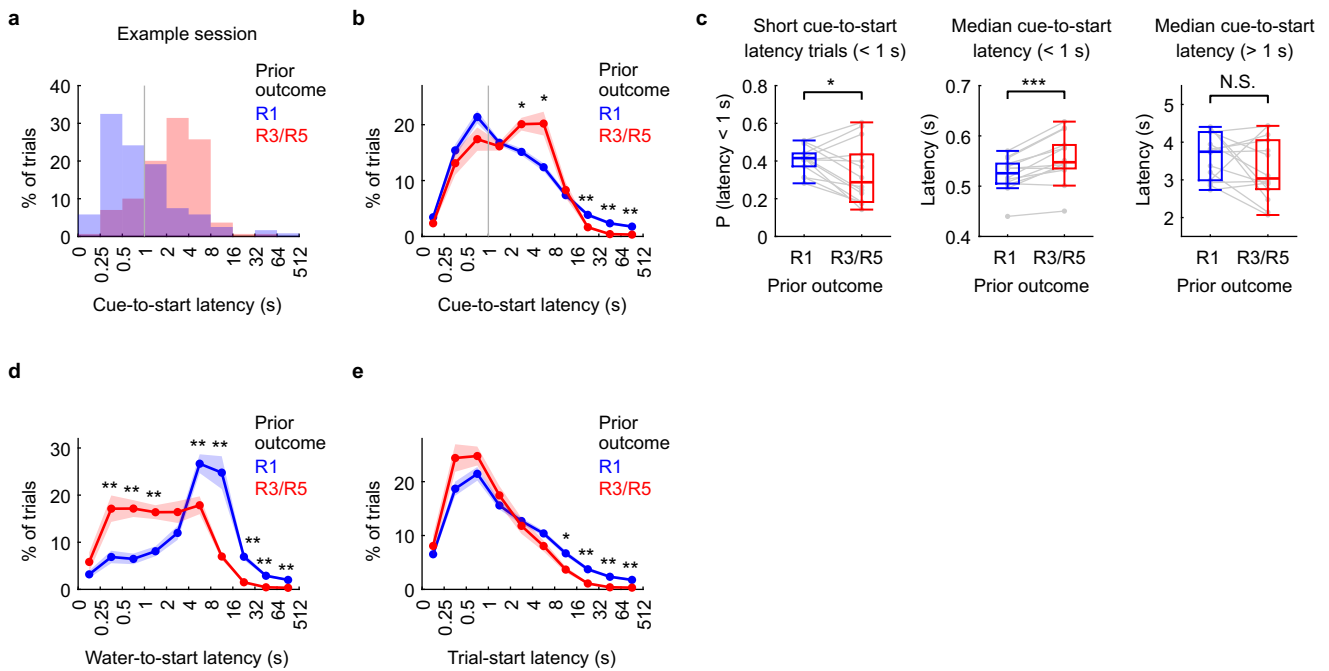

23 **Supplementary Fig. 1 | Latency measures related to next-trial initiation as a function of**  
 24 **prior outcome.**

25 Cue-to-start, water-to-start, and trial-start latency distributions were compared across prior reward  
 26 conditions. Distributions were plotted in 10 bins spaced on a  $\log_2$  scale, with the first bin covering 0–  
 27 0.25 s and subsequent bins spanning 0.25–512 s. In all panels, trials were grouped by prior outcome,  
 28 defined as the reward delivered on the rewarded trial immediately preceding the measured latency: R1  
 29 (pooled across R1b and R1s) versus R3/R5 (pooled across R3 and R5).

30 **a**, Representative session showing the distribution (% of trials) of cue-to-start latency.

31 **b**, Mean  $\pm$  s.e.m. cue-to-start latency distribution across rats ( $n = 14$ ). Within each rat, latencies were  
 32 binned on a logarithmic scale and converted to the proportion of trials in each bin; bin-wise proportions  
 33 were then averaged across rats. After R1 outcomes, cue-to-start latency distributions showed a sharp  
 34 early peak at approximately 500 ms with a long tail, indicating rapid cue-triggered initiation on a  
 35 subset of trials.

36 **c**, Cue-to-start latency comparisons across rats ( $n = 14$ ). *Left*, proportion of short-latency trials ( $< 1$  s).  
 37 *Middle*, median latency of short-latency trials ( $< 1$  s). *Right*, median latency of long-latency trials ( $>$   
 38 1 s). Short cue-to-start latencies occurred more frequently and were shorter on average after R1 than  
 39 after R3/R5. Gray lines indicate paired data from individual rats. Statistical significance was  
 40 determined using Wilcoxon signed-rank tests;  $*P < 0.05$ ,  $***P < 0.001$ ; N.S., not significant.

41 **d**, Mean  $\pm$  s.e.m. water-to-start latency distribution across rats ( $n = 14$ ), analyzed as in **b**. The  
 42 distributions of cue-to-start and water-to-start latencies differed. This finding supports the idea that  
 43 initiation of the next trial is mediated by either cue-evoked re-engagement or spontaneous initiation  
 44 following a reward, depending on the behavioral state at cue onset.

45 **e**, Mean  $\pm$  s.e.m. trial-start latency distribution across rats ( $n = 14$ ), analyzed as in **b**. For each trial,  
 46 the trial-start latency was defined as the shorter of the cue-to-start and water-to-start latencies.

47 In **b**, **d**, and **e**, asterisks denote bins with significant differences between conditions (Wilcoxon signed-  
 48 rank tests with Bonferroni correction across 10 bins;  $*P < 0.05$ ,  $**P < 0.01$ ).

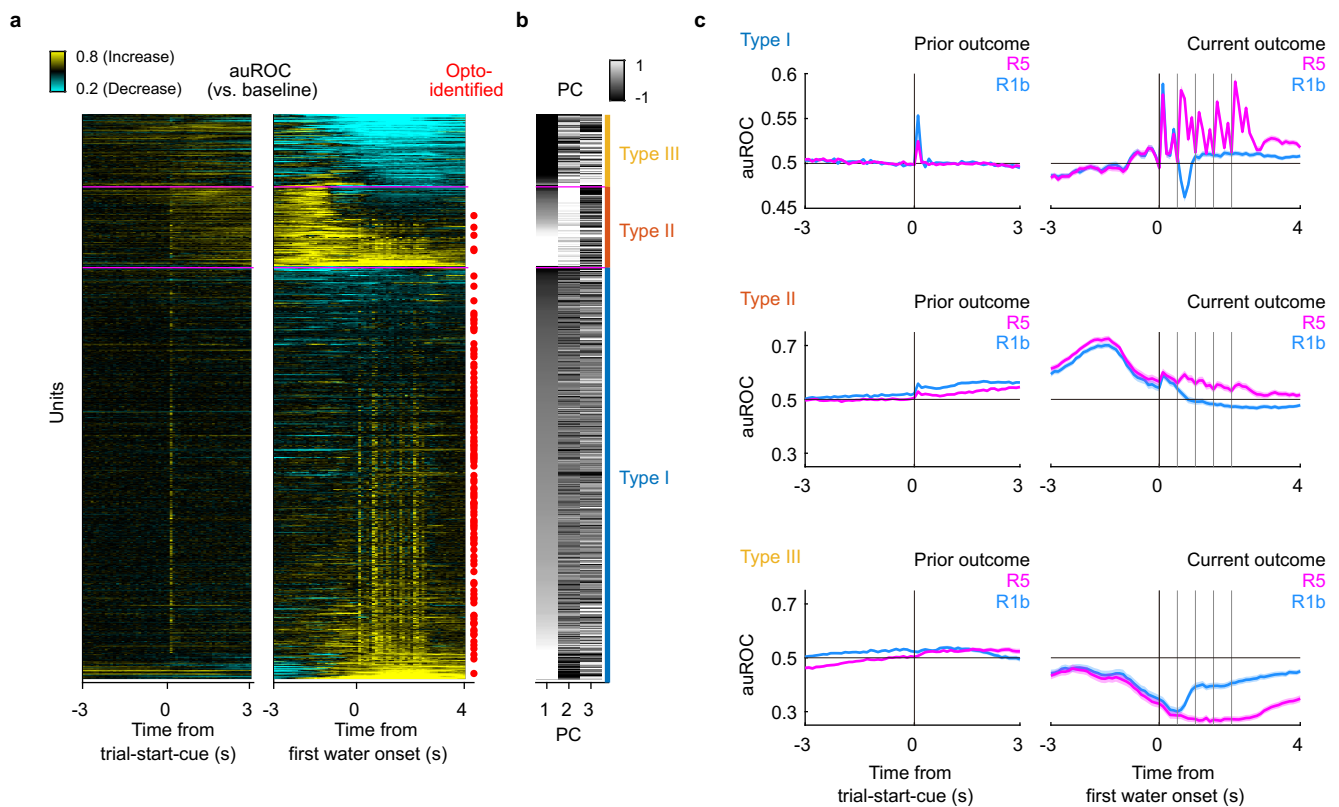

## 49 **Supplementary Fig. 2 | Clustering of VTA unit activity.**

50 **a**, Normalized activity shown as auROC values relative to pre-trial-start-cue activity (pre-L0; -3 to 0  
 51 s from L0 onset) for all recorded units ( $n = 780$ ). Activity is aligned to the trial-start-cue onset for trials  
 52 preceded by an R1b outcome (*left*) and to the water onset for trials with a current R5 outcome (*right*).  
 53 For each unit, binned spike activity aligned to the trial-start-cue onset (-3 to 3 s) in trials following an  
 54 R1b outcome and to water onset (-3 to 4 s) in R5 trials was concatenated, and auROC was computed  
 55 relative to the pre-L0 window. Units were categorized into three clusters via k-means clustering based  
 56 on their scores on the first three principal components (PC1-PC3; ~83% explained variance). These  
 57 clusters correspond to phasic, positive-ramping (increasing activity), and negative-ramping  
 58 (decreasing activity) units (Types I-III;  $n = 573, 117, \text{ and } 90$ , respectively). Units were reordered by  
 59 PC1 within each cluster. Optogenetically identified dopamine neurons (red dots) were predominantly  
 60 categorized as Type I (111 of 115; 96.5%) and exhibited phasic responses to both trial-start-cue and  
 61 water onset.

62 **b**, Projections (PC scores) of individual units onto PC1-PC3 used for clustering, ordered as in **a** and  
 63 color-coded by cluster identity (Types I-III).

64 **c**, Mean  $\pm$  s.e.m. auROC time courses of the three unit types aligned to trial-start-cue (*left*) and water  
 65 onset (*right*), grouped by prior reward size (specifically, the reward delivered immediately before trial-  
 66 start-cue onset; R1b versus R5; *left*) and current reward size (R1b versus R5; *right*). Light gray vertical  
 67 lines in the *right* panels indicate the timings of the five consecutive water deliveries in R5 trials. For  
 68 clarity, R1b and R5 are shown; similar subtype-specific temporal profiles were also observed for R1s  
 69 and R3. In some traces, s.e.m. is smaller than the line width and therefore not visually discernible.  
 70 auROC, area under the receiver operating characteristic curve.

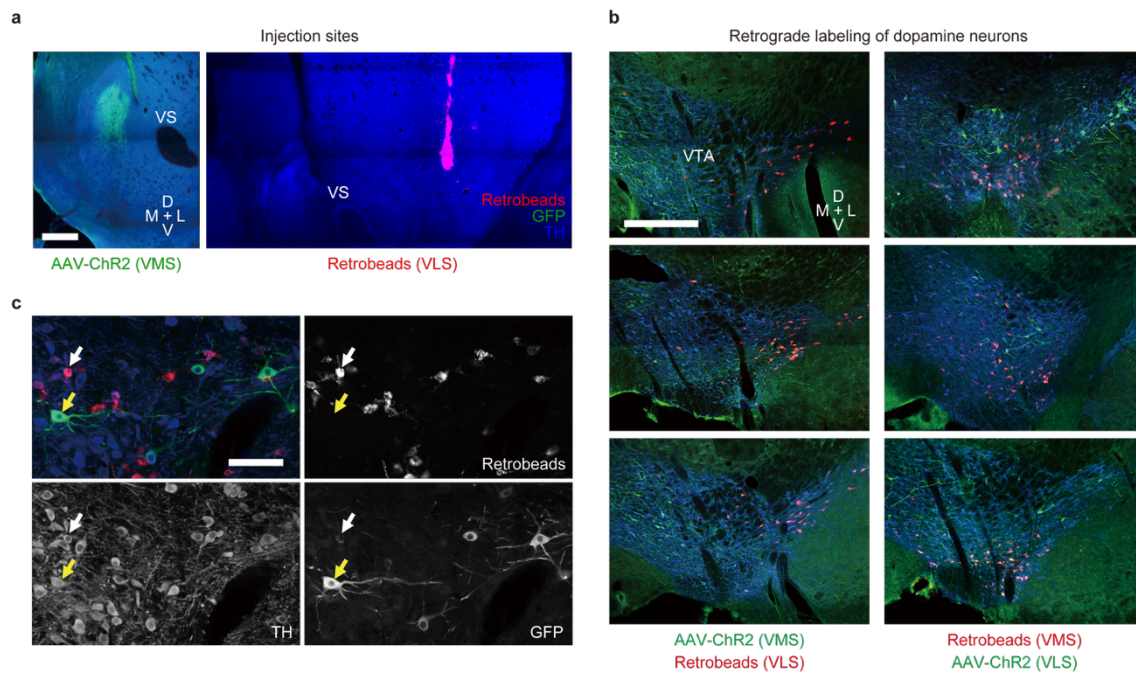

71 **Supplementary Fig. 3 | Projection-specific labeling of VTA dopamine neurons.**

72 **a**, Photomicrographs of representative injection sites in the ventral striatum (VS) of a TH-Cre rat.  
 73 AAVrg-DIO-ChR2-EYFP was injected into the ventromedial striatum (VMS; *left*, green), and  
 74 RetroBeads were injected into the ventrolateral striatum (VLS; *right*, red). TH immunostaining is  
 75 displayed in blue. Scale bar, 500  $\mu$ m.

76 **b**, Retrogradely labeled dopamine neurons in the VTA following injections of RetroBeads (red) into  
 77 the VLS and AAVrg-DIO-ChR2-EYFP (green) into the VMS (*left column*,  $n = 3$  rats), or RetroBeads  
 78 into the VMS and AAVrg-DIO-ChR2-EYFP into the VLS (*right column*,  $n = 3$  rats). TH  
 79 immunostaining is displayed in blue. The *top-left* panel corresponds to the injection example shown  
 80 in **a**. Labeled VTA neurons were localized more medially for VMS-projecting neurons and more  
 81 laterally for VLS-projecting neurons. These distributions partially overlap, consistent with previous  
 82 reports (de Jong et al. 2024<sup>1</sup> and Farassat et al. 2019<sup>2</sup>). Scale bar, 500  $\mu$ m.

83 **c**, High-magnification micrographs of the lateral VTA showing overlapping signals of RetroBeads,  
 84 GFP, and TH. VMS- and VLS-projecting dopamine neurons intermingled within the lateral VTA,  
 85 particularly in the spatially overlapping regions shown in **b**. White arrows indicate TH-positive  
 86 neurons labeled with RetroBeads (VMS-projecting), and yellow arrows indicate TH-positive neurons  
 87 labeled with GFP (VLS-projecting). Scale bar, 100  $\mu$ m.

88 D, dorsal; V, ventral; M, medial; L, lateral; VMS, ventromedial striatum; VLS, ventrolateral striatum;  
 89 VTA, ventral tegmental area.

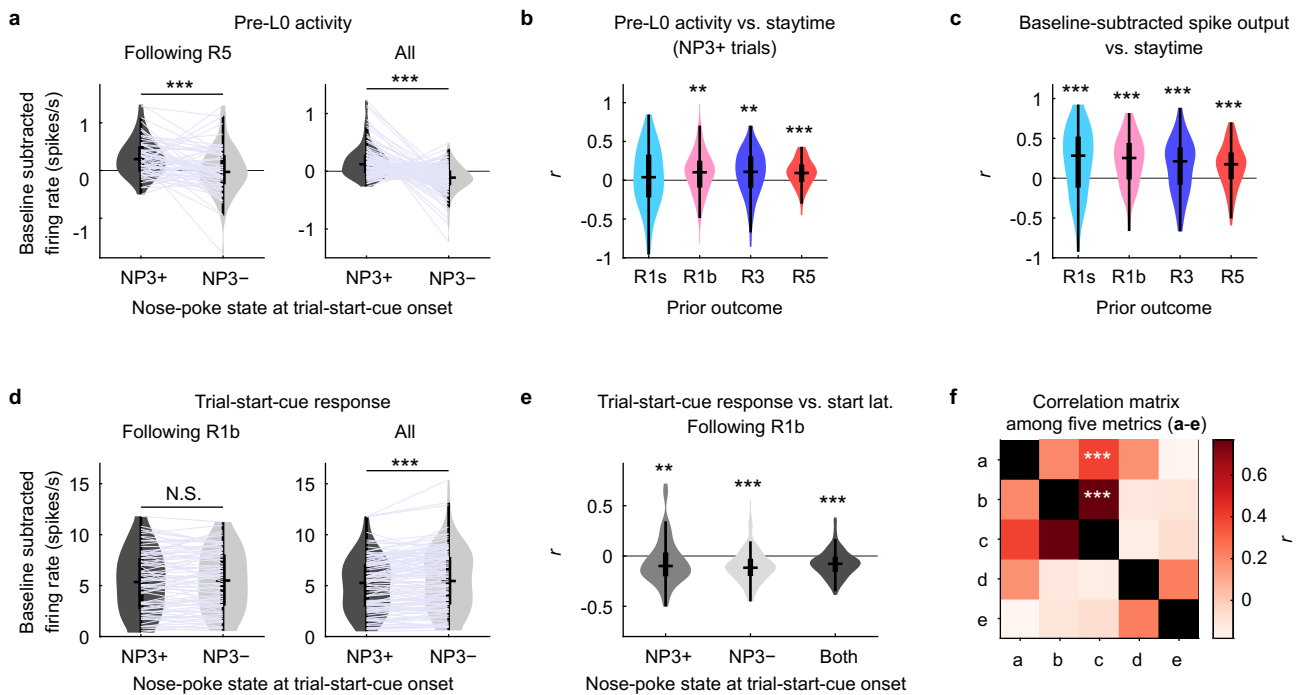

90 **Supplementary Fig. 4 | Robustness of pre-L0 activity and trial-start-cue responses in**  
 91 **analyses separated by nose-poke state.**

92 Baseline and response definitions varied across panels: **a** and **b** use pre-L0 activity relative to trial-  
 93 start-cue onset, **c** uses a pre-exit reference baseline relative to NP3-out to isolate activity during  
 94 staytime, and **d** and **e** use trial-start-cue responses relative to trial-start-cue onset. To test whether  
 95 dopamine–behavior relationships depended on overt nose-poke state at trial-start-cue onset, trials were  
 96 separated into NP3+ trials, in which rats were still nose-poking in the water port, and NP3– trials, in  
 97 which rats had already exited the water port. This distinction also corresponded to the latency  
 98 component contributing to the integrated trial-start latency measure: in NP3+ trials, trial-start latency  
 99 was determined by water-to-start latency, whereas in NP3– trials, it was determined by cue-to-start  
 100 latency.

101 **a**, Pre-L0 activity preceding trial-start-cue onset (–4 to 0 s) compared between NP3+ and NP3– trials.  
 102 Pre-L0 activity was quantified as a baseline-subtracted firing rate, computed as the firing rate in the  
 103 –4 to 0 s window minus the mean firing rate in the same window across all trials. *Left*, analysis  
 104 restricted to trials with prior outcome R5 ( $n = 67$  units). *Right*, the same analysis with all rewarded  
 105 trials from all optogenetically identified VTA dopamine neurons pooled together ( $n = 115$  units). Pre-  
 106 L0 activity was significantly higher in NP3+ than in NP3– trials in both analyses (Wilcoxon signed-  
 107 rank tests;  $***P < 0.001$ ). Units were included if both nose-poke states contained more than five trials.

108 **b**, Pearson’s  $r$  values for correlations between pre-L0 activity and staytime in NP3+ trials, separated  
 109 by prior outcome (the reward delivered immediately before trial-start-cue onset; R1s, R1b, R3, R5).  
 110 Correlations were tested against zero using Wilcoxon signed-rank tests with Bonferroni correction  
 111 across four comparisons ( $n = 77, 86, 105,$  and  $115$  units, respectively;  $**P < 0.01, ***P < 0.001$ ).  
 112 Units were included if the number of trials contributing to a given correlation exceeded five. Positive  
 113 correlations within NP3+ trials indicate that the pre-L0 activity–staytime relationship persisted within  
 114 a fixed nose-poke state.

115 **c**, Supplementary analysis of activity during staytime. Pearson’s  $r$  values were computed for

116 correlations between baseline-subtracted spike output during staytime and staytime duration during  
117 water-port engagement, stratified by prior outcome as in **b**. Spike output was computed over the  
118 staytime period after excluding the water delivery window [0.5 s for single-drop rewards (R1s/R1b),  
119 1.5 s for R3, and 2.5 s for R5], thereby removing reward-evoked activity from the analysis window.  
120 For each trial, spike output was baseline-subtracted by removing the expected baseline spikes (mean  
121 baseline rate  $\times$  adjusted staytime duration). Because mean firing rates gradually decreased during  
122 staytime toward the level observed near NP3-out, the reference baseline was defined as the 1-s period  
123 preceding NP3-out (-1 to 0 s). This baseline-subtracted output provides a cumulative measure of  
124 above-baseline activity during reward-site engagement (Zhu et al. 2025<sup>3</sup>; see Methods for details).  
125 Correlations were tested against zero using Wilcoxon signed-rank tests with Bonferroni correction  
126 across four comparisons ( $n = 108, 115, 107,$  and  $115$  units, respectively;  $***P < 0.001$ ). Units were  
127 included if the number of trials contributing to each correlation exceeded five.

128 **d**, Trial-start-cue responses (0 to 0.2 s after trial-start-cue onset) were compared between NP3+ and  
129 NP3- trials. *Left*, analysis restricted to trials with prior outcome R1b ( $n = 84$  units). *Right*, analysis  
130 pooling all rewarded trials from all optogenetically identified VTA dopamine neurons ( $n = 115$  units).  
131 No difference was observed after R1b, whereas a robust difference emerged in the pooled analysis  
132 (Wilcoxon signed-rank tests; N.S., not significant;  $***P < 0.001$ ). Units were included if both nose-  
133 poke states contained more than five trials. The absence of a difference after R1b indicates that trial-  
134 start-cue responses in the condition used for the main correlation analysis were not simply determined  
135 by overt nose-poke state.

136 **e**, Pearson's  $r$  values for correlations between trial-start-cue responses and trial-start latency, computed  
137 from NP3+ trials only, NP3- trials only, or both states combined ( $n = 86, 114,$  and  $115$  units,  
138 respectively). All three analyses showed significant negative correlations (Wilcoxon signed-rank tests;  
139  $**P < 0.01, ***P < 0.001$ ), indicating that cue-evoked responses tracked trial-start latency irrespective  
140 of overt nose-poke state at trial-start-cue onset. Units were included if both nose-poke states contained  
141 more than five trials.

142 **f**, Correlation matrix summarizing the relationships among neuron-specific metrics derived from **a-e**  
143 for all optogenetically identified VTA dopamine neurons ( $n = 115$ ). Each metric was computed once  
144 per neuron using the trial set specified for the corresponding panel: **(a)** NP3+ versus NP3- pre-L0  
145 activity differences from all rewarded trials; **(b)** pre-L0 activity-staytime correlations from NP3+ trials  
146 with prior outcome R5; **(c)** staytime-spike-output correlations during staytime from NP3+ trials with  
147 prior outcome R5; **(d)** NP3+ versus NP3- trial-start-cue response differences from all rewarded trials;  
148 and **(e)** trial-start-cue response-trial-start latency correlations from NP3+ and NP3- trials combined.  
149 Pearson's  $r$  values were calculated for each pair of metrics across neurons (10 pairs total). Only two  
150 pairs, **(a-c)** and **(b-c)**, remained significant after Bonferroni correction ( $***P < 0.001$ ), indicating that  
151 metrics related to pre-L0 activity and staytime covaried across neurons, whereas trial-start-cue-related  
152 metrics showed weaker relationships with these measures. Because the matrix is symmetric,  
153 significance markers are shown only for the 10 unique pairs in the upper triangle.

154 Light gray lines in **a** and **d** connect paired values from the same neuron. Together, these analyses  
155 indicate that the relationships between pre-L0 activity and staytime, and between trial-start-cue  
156 responses and trial-start latency, were not explained solely by nose-poke state at trial-start-cue onset  
157 or by the latency component contributing to the integrated trial-start latency measure.

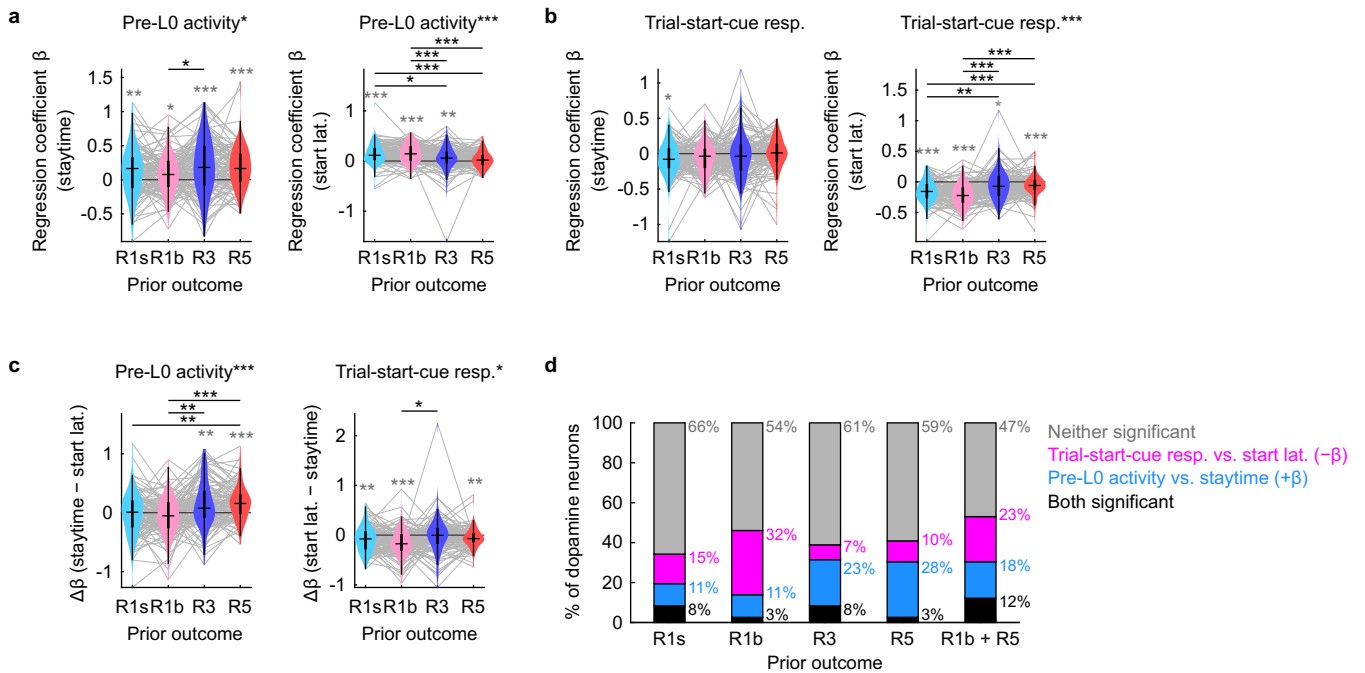

158 **Supplementary Fig. 5 | Regression coefficients characterizing the relationships between**  
 159 **dopamine neuron activity and behavioral variables across prior outcomes.**

160 **a**, Regression coefficients ( $\beta$ ) predicting z-scored pre-L0 activity ( $-4$  to  $0$  s before trial-start-cue onset)  
 161 from z-scored staytime (*left*) or z-scored log-transformed trial-start latency (*right*). Coefficients were  
 162 estimated independently for each prior outcome (R1s, R1b, R3, and R5). Pre-L0 activity showed  
 163 significantly positive regression coefficients for staytime across all prior outcomes. Regression models  
 164 were fitted separately for each optogenetically identified dopamine neuron recorded in both SMALL  
 165 and BIG blocks ( $n = 108$ ), using pooled trials across block types and including the session-level z-  
 166 scored trial number as an additional covariate.

167 **b**, Same as **a** but for regression coefficients predicting z-scored trial-start-cue responses ( $0$  to  $0.2$  s  
 168 after cue onset). Trial-start-cue responses showed more negative regression coefficients for trial-start  
 169 latency after small rewards (R1s and R1b) than after large rewards (R3 and R5).

170 **c**, Contrasts in regression coefficients ( $\Delta\beta$ ) summarizing the relative contributions of staytime and  
 171 trial-start latency to pre-L0 activity and trial-start-cue responses across prior outcomes. For pre-L0  
 172 activity (*left*),  $\Delta\beta = \beta_{\text{staytime}} - \beta_{\text{start lat.}}$ , such that positive values indicate a more positive, or less negative,  
 173 coefficient for staytime than for trial-start latency. For trial-start-cue responses (*right*),  $\Delta\beta = \beta_{\text{start lat.}} -$   
 174  $\beta_{\text{staytime}}$ , such that positive values indicate a more positive, or less negative, coefficient for trial-start  
 175 latency than for staytime. Shifts in  $\Delta\beta$  across prior outcomes quantify how the dominant behavioral  
 176 predictor changes with reward size.

177 **d**, Proportions of dopamine neurons meeting two significance criteria across prior outcomes: a  
 178 significantly negative regression coefficient for trial-start-cue responses versus trial-start latency and  
 179 a significantly positive regression coefficient for pre-L0 activity versus staytime. Neurons showing  
 180 both patterns are indicated in black, and neurons showing neither pattern are indicated in gray. The  
 181 final column (R1b + R5) summarizes the classification using the negative trial-start-latency-related  
 182 coefficient from R1b and the positive staytime-related coefficient from R5. Numerals indicate the

183 percentage of neurons in each category.

184 For **a–c**, asterisks in the panel titles indicate significant effects of prior outcome in Friedman tests  
185 across the four reward conditions ( $*P < 0.05$ ,  $***P < 0.001$ ). Asterisks above horizontal brackets  
186 indicate significant post hoc Tukey–Kramer tests between specific reward conditions ( $*P < 0.05$ ,  $**P$   
187  $< 0.01$ ,  $***P < 0.001$ ), and asterisks directly above the individual distributions indicate significant  
188 deviations of the regression coefficients from zero (Wilcoxon signed-rank tests with Bonferroni  
189 correction across the four prior outcomes;  $*P < 0.05$ ,  $**P < 0.01$ ,  $***P < 0.001$ ). For all panels, the  
190 prior outcome was defined as the reward delivered immediately before the end of the latency interval  
191 (staytime or trial-start latency) or immediately before the duration during which pre-L0 activity or  
192 trial-start-cue responses were calculated.

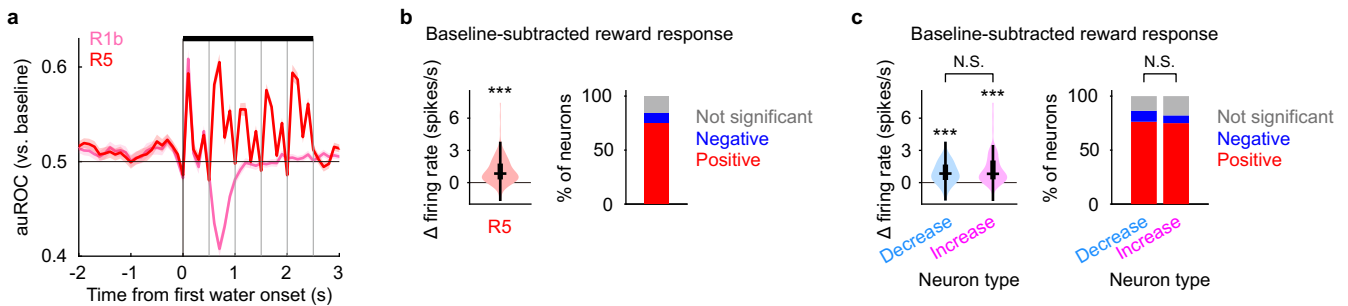

193 **Supplementary Fig. 6 | Reward responses are comparable between increase- and decrease-**  
 194 **type dopamine neurons.**

195 **a**, Mean  $\pm$  s.e.m. normalized activity (auROC relative to the firing rate in the pre-trial-start-cue window,  
 196  $-1$  to  $0$  s from trial-start-cue (L0) onset; 100-ms bins) of optogenetically identified dopamine neurons  
 197 ( $n = 115$ ) aligned to water onset (first drop) in trials with five sequentially delivered rewards (R5, red)  
 198 or a single reward (R1b, pink). Gray vertical lines indicate water-delivery timings in R5 trials; the  
 199 black bar denotes the reward-response window used in **b** and **c**.

200 **b**, Baseline-subtracted reward response in R5 trials. Pre-L0 firing rate was defined for each neuron as  
 201 the mean firing rate in the pre-trial-start-cue window ( $-1$  to  $0$  s from trial-start-cue (L0) onset),  
 202 averaged across all trials. For each R5 trial, the baseline-subtracted reward response was computed as  
 203 the mean firing rate in the reward window ( $0$  to  $2.5$  s after water onset; black bar in **a**) minus this pre-  
 204 L0 firing rate. *Left*, baseline-subtracted reward responses across neurons (Wilcoxon signed-rank test  
 205 against zero, \*\*\* $P < 0.001$ ). *Right*, proportions of neurons displaying significantly positive (red) or  
 206 negative (blue) reward responses. For each neuron, trial-wise baseline-subtracted reward responses  
 207 were evaluated against zero across trials (Wilcoxon signed-rank test,  $P < 0.05$ ); the remaining neuronal  
 208 population was categorized as not significantly modulated (gray).

209 **c**, Comparison of baseline-subtracted R5 reward responses between decrease-type ( $n = 59$ ) and  
 210 increase-type ( $n = 56$ ) dopamine neurons. *Left*, baseline-subtracted reward responses in each subtype;  
 211 asterisks above each distribution denote significant excitation relative to zero (Wilcoxon signed-rank  
 212 test, \*\*\* $P < 0.001$ ), and “N.S.” above the horizontal bracket indicates no significant difference  
 213 between subtypes (Wilcoxon rank-sum test,  $P > 0.05$ ). *Right*, proportions of neurons in each subtype  
 214 showing significantly positive (red) or negative (blue) reward responses, or no significant modulation,  
 215 using the same within-neuron criterion as in **b** (Wilcoxon signed-rank test against zero,  $P < 0.05$ ).  
 216 Population differences in the proportions of neurons with positive, negative, or nonsignificant reward  
 217 responses between subtypes were evaluated with a  $\chi^2$  test (“N.S.”,  $P > 0.05$ ).

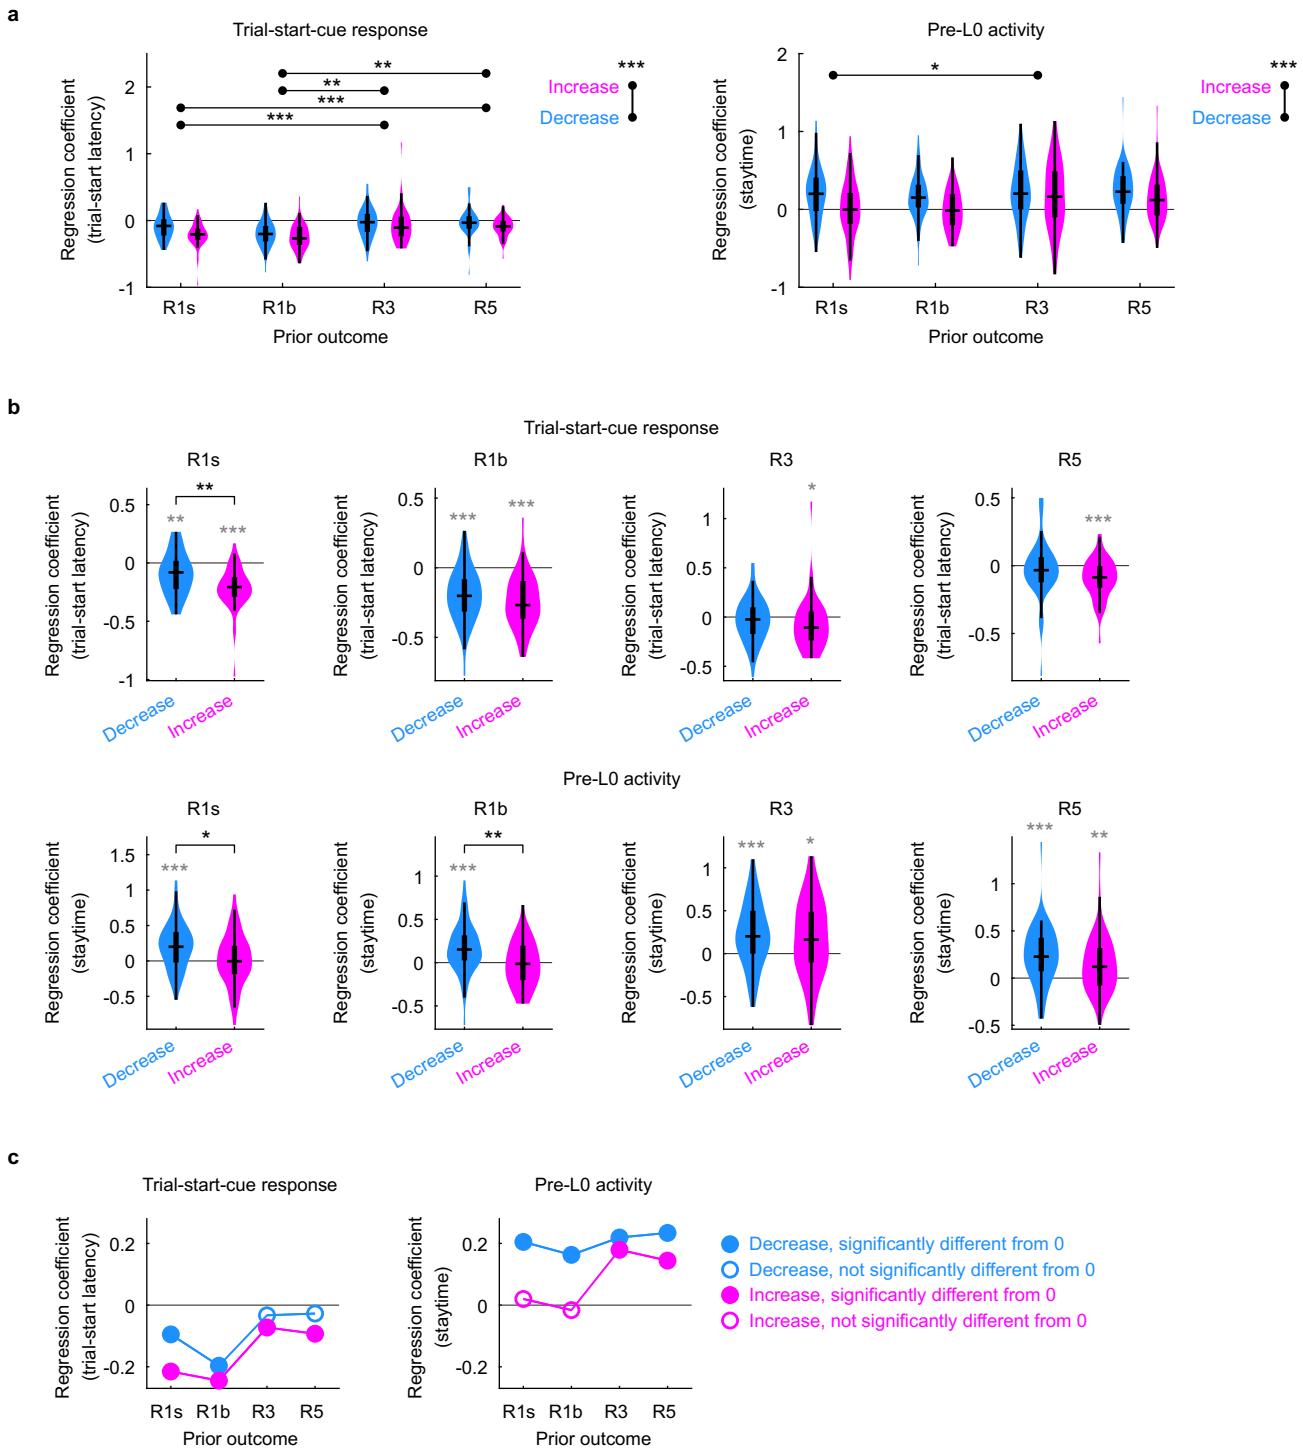

218 **Supplementary Fig. 7 | Regression coefficients for predicting pre-L0 activity and trial-start-cue**  
 219 **responses, separated by dopamine neuron subtype.**

220 **a**, Regression coefficients were derived from the same multiple linear regression models used in  
 221 **Supplementary Fig. 5**, shown separately by dopamine neuron subtype (decrease-type,  $n = 59$ ;  
 222 increase-type,  $n = 56$ ) and prior outcome (R1s, R1b, R3, R5). *Left*, regression coefficients predicting  
 223 z-scored trial-start-cue responses (0 to 0.2 s after trial-start-cue onset; “Trial-start-cue response”) from

224 z-scored trial-start latency (“Regression coefficient (trial-start latency)”). *Right*, regression  
225 coefficients predicting z-scored pre-L0 activity (−4 to 0 s before trial-start-cue onset; “Pre-L0  
226 activity”) from z-scored staytime (“Regression coefficient (staytime)”). Increase-type neurons  
227 displayed more negative coefficients for predicting trial-start-cue responses from trial-start latency,  
228 whereas decrease-type neurons showed more positive coefficients for predicting pre-L0 activity from  
229 staytime. Statistical analysis was performed with a two-way ANOVA (independent variables:  
230 dopamine subtype and prior outcome), followed by Tukey–Kramer post hoc tests when main effects  
231 were significant ( $*P < 0.05$ ,  $**P < 0.01$ ,  $***P < 0.001$ ).

232 **b**, The same regression coefficients as in **a**, replotted separately for each prior outcome to compare  
233 increase- and decrease-type neurons within each condition. *Top*, regression coefficients predicting  
234 trial-start-cue responses from trial-start latency. *Bottom*, regression coefficients predicting pre-L0  
235 activity from staytime. For each outcome, regression coefficients for increase- and decrease-type  
236 neurons were compared using Wilcoxon rank-sum tests and tested against zero within each subtype  
237 using Wilcoxon signed-rank tests with Bonferroni correction across the two within-subtype tests ( $*P$   
238  $< 0.05$ ,  $**P < 0.01$ ,  $***P < 0.001$ ).

239 **c**, Summary plots showing the mean regression coefficients across prior outcomes for increase- and  
240 decrease-type neurons. For each outcome and subtype, the regression coefficients were tested against  
241 zero using the same Wilcoxon signed-rank tests as in **b**. Filled circles indicate coefficients significantly  
242 different from zero after Bonferroni correction ( $P < 0.05$ ); open circles indicate nonsignificant  
243 coefficients.

244 For all panels, the prior outcome was defined as the reward delivered immediately before the end of  
245 the latency interval (staytime or trial-start latency) or immediately before the duration during which  
246 pre-L0 activity or trial-start-cue responses were calculated.

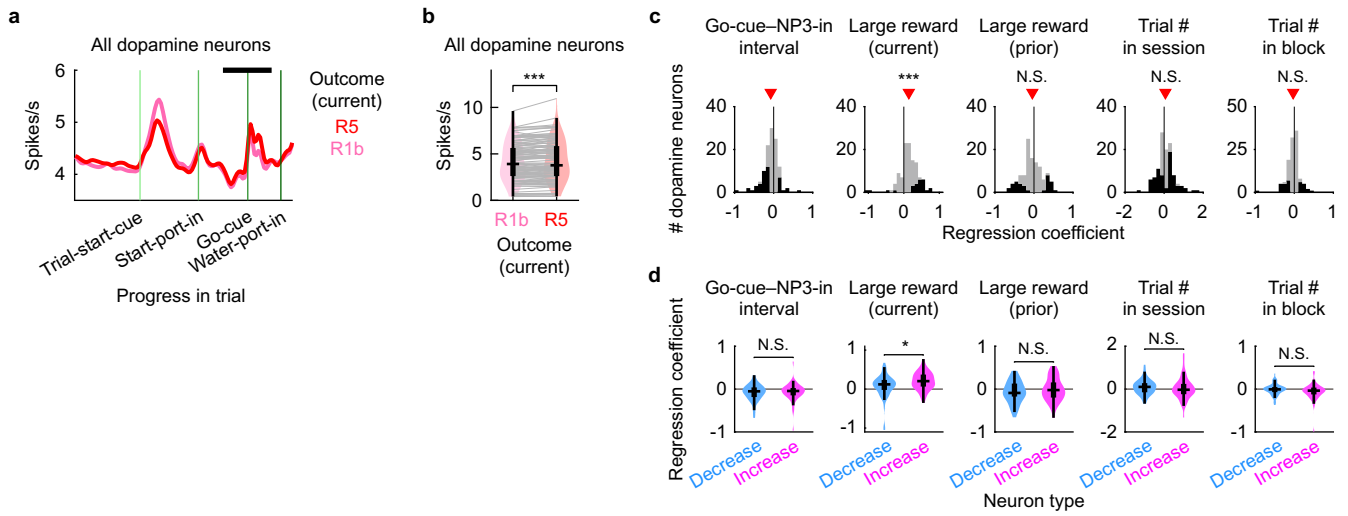

247 **Supplementary Fig. 8 | Dopamine neurons encode predicted upcoming reward size during**  
 248 **the period around the go-cue.**

249 Related to **Fig. 7**, this analysis examines whether the encoding of predicted upcoming reward size  
 250 during the go-cue period persists when prior-trial reward size is included as an additional covariate in  
 251 a regression model.

252 **a**, Time-in-trial-aligned activity showing the mean firing rates of all optogenetically identified  
 253 dopamine neurons ( $n = 115$ ) during large-reward (R5, red) and small-reward (R1b, pink) trials in BIG  
 254 blocks, with trials pooled across prior outcomes. Vertical lines indicate task events (trial-start-cue,  
 255 start-port-in, go-cue, and water-port-in). The black bar denotes the go-cue-centered analysis window  
 256 ( $-1.5$  to  $1.5$  s from go-cue onset in real, unwarped time) used in **b–d**.

257 **b**, Mean firing rates during the go-cue window (black bar in **a**), comparing R1b and R5 trials across  
 258 the dopamine neuron population (BIG-block trials only; Wilcoxon signed-rank test;  $***P < 0.001$ ).

259 **c**, Distributions of regression coefficients across dopamine neurons ( $n = 115$ ) from multiple linear  
 260 regression models fitted separately for each neuron to predict trial-by-trial dopamine responses (z-  
 261 scored firing rates in the go-cue window). Predictors included the z-scored interval from go-cue onset  
 262 to water-port-in (NP3-in) (“Go-cue–NP3-in interval”); upcoming reward size on the current trial  
 263 (“Large reward (current)”; binary indicator: 1 = R5, 0 = R1b); reward size on the immediately  
 264 preceding trial (“Large reward (prior)”; binary indicator: 1 = R5, 0 = R1b); z-scored trial number  
 265 within session (“Trial # in session”); and z-scored trial number within block (“Trial # in block”). Only  
 266 BIG-block trials were included. Black bars denote neurons with significant coefficients for the  
 267 corresponding predictor ( $P < 0.05$ ; t-test of the regression coefficient); light gray bars denote neurons  
 268 with nonsignificant coefficients. Red arrowheads denote the mean regression coefficient across  
 269 neurons; population-level deviations from zero were evaluated using Wilcoxon signed-rank tests  
 270 ( $***P < 0.001$ ; N.S.,  $P > 0.05$ ).

271 **d**, The same regression coefficients as in **c**, separated by dopamine neuron type (increase-type,  $n = 56$ ;  
 272 decrease-type,  $n = 59$ ). Regression coefficients were compared between neuron types using Wilcoxon  
 273 rank-sum tests ( $*P < 0.05$ ; N.S.,  $P > 0.05$ ).

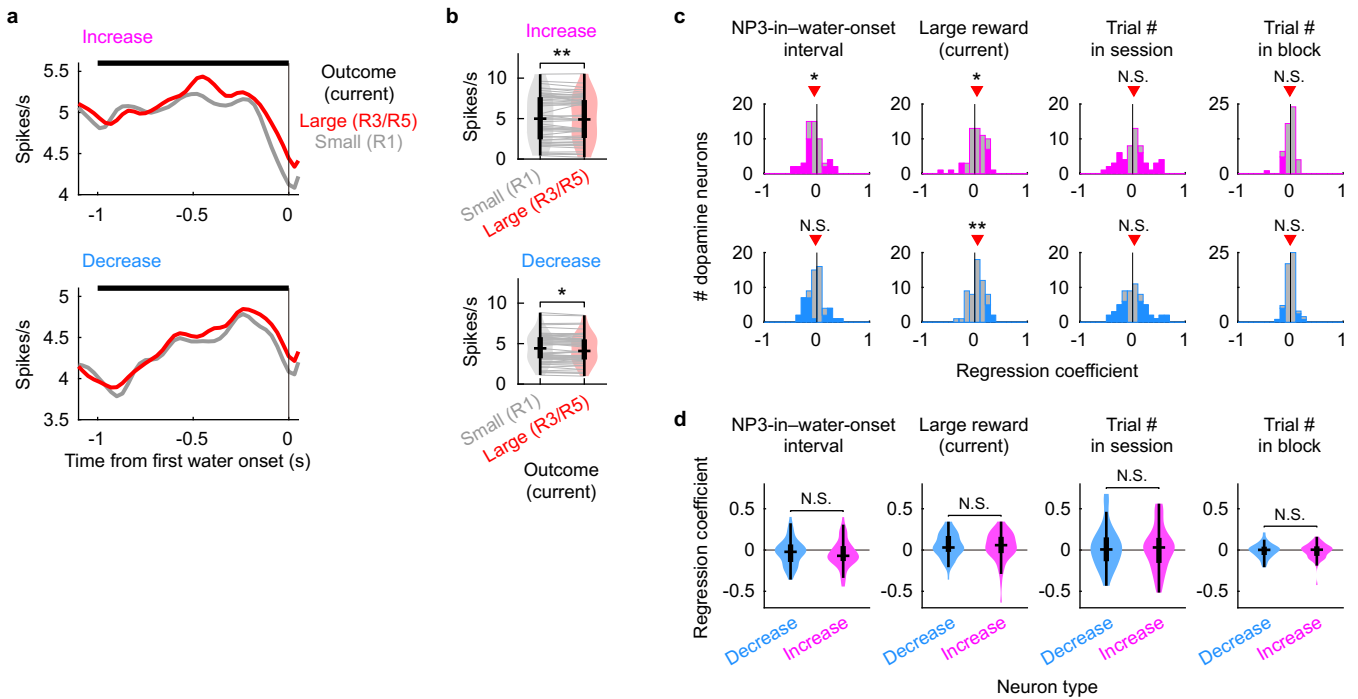

274 **Supplementary Fig. 9 | Pre-water-onset activity in both dopamine neuron types is modulated**  
 275 **by upcoming reward size.**

276 **a**, PSTHs showing mean firing rates of increase-type (*top*;  $n = 51$ ) and decrease-type (*bottom*;  $n = 57$ )  
 277 dopamine neurons aligned to water onset ( $-1.2$  to  $0.1$  s). Trials with current large-reward (R3/R5, red)  
 278 and small-reward (R1, gray) are compared. Panels **a** and **b** utilize the subset of optogenetically  
 279 identified dopamine neurons recorded in both SMALL and BIG blocks ( $n = 108$ ).

280 **b**, Mean firing rates during the pre-reward window ( $-1$  to  $0$  s; black bar in **a**) were evaluated across  
 281 current small- and large-reward trials for increase-type (*top*) and decrease-type (*bottom*) neurons  
 282 (using the same neurons as in **a**) (Wilcoxon signed-rank test; \* $P < 0.05$ , \*\* $P < 0.01$ ).

283 **c**, Distributions of regression coefficients from per-neuron multiple linear regression models  
 284 predicting trial-by-trial z-scored firing rates during the same pre-reward window ( $-1$  to  $0$  s) using four  
 285 predictors: the duration from the first water-port-in (NP3-in) to the first water onset (“NP3-in-water-  
 286 onset interval”), which varied across trials depending on the time required to satisfy the NP3 hold  
 287 requirement; reward size on the current trial (“Large reward (current)”; binary indicator:  $1 = R3/R5$ ,  
 288  $0 = R1$ ); trial number within session (“Trial # in session”); and trial number within block (“Trial # in  
 289 block”). Trials from both BIG and SMALL blocks were included. This analysis utilizes the same  
 290 regression framework as in **Fig. 7**, with the NP3-in-water-onset interval as the timing covariate. Panels  
 291 **c** and **d** use the full set of optogenetically identified dopamine neurons ( $n = 115$ ). Coefficients are  
 292 shown separately for increase-type (*top*;  $n = 56$ ) and decrease-type (*bottom*;  $n = 59$ ) neurons. Colored  
 293 bars denote neurons with significant regression coefficients (t-test of the regression coefficient;  $P <$   
 294  $0.05$ ); light gray bars denote neurons with nonsignificant coefficients. Red arrowheads denote the  
 295 mean regression coefficient across neurons; population-level deviations from zero were evaluated  
 296 using Wilcoxon signed-rank tests (\* $P < 0.05$ , \*\* $P < 0.01$ ; N.S.,  $P > 0.05$ ).

297 **d**, Regression coefficients for each predictor are shown separately for increase- and decrease-type  
 298 neurons (Wilcoxon rank-sum tests; N.S.,  $P > 0.05$ ).

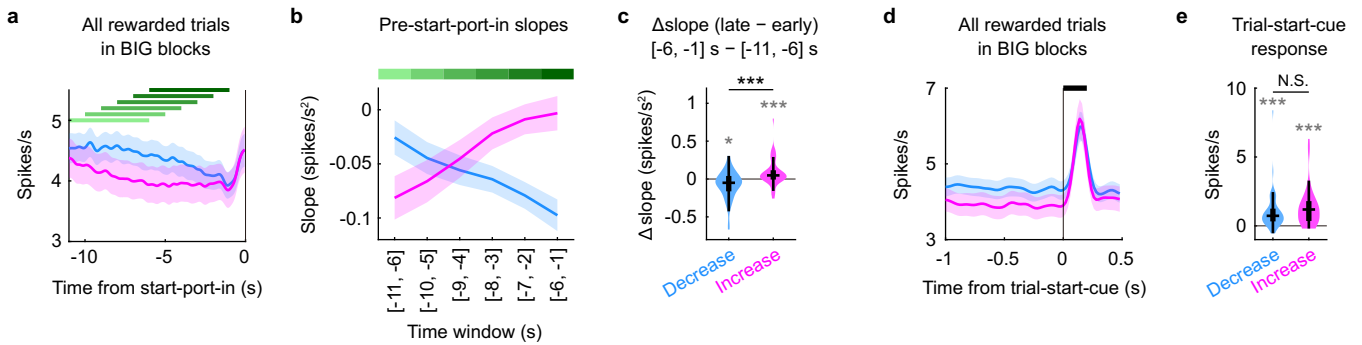

299 **Supplementary Fig. 10 | Pre-initiation activity transitions in increase- and decrease-type**  
 300 **dopamine neurons.**

301 **a**, Mean firing rates (mean  $\pm$  s.e.m.) of increase-type (magenta;  $n = 56$ ) and decrease-type (cyan;  $n =$   
 302  $59$ ) dopamine neurons aligned to start-port-in (NP0-in). All rewarded trials from BIG blocks were  
 303 included (not separated by prior outcome).

304 **b**, Pre-start-port-in slopes (mean  $\pm$  s.e.m.) computed in overlapping 5-s windows sliding in 1-s steps,  
 305 using the same neurons as in **a** (windows:  $-11$  to  $-6$ ,  $-10$  to  $-5$ ,  $-9$  to  $-4$ ,  $-8$  to  $-3$ ,  $-7$  to  $-2$ , and  $-6$   
 306 to  $-1$  s; green bars in **a**). For each neuron and each window, a linear regression was fitted to the firing  
 307 rate within the 5-s window to derive a slope; slopes were then averaged across neurons within each  
 308 subtype (see Methods). Increase- and decrease-type neurons demonstrated opposing dynamics in these  
 309 pre-start-port-in slopes.

310 **c**, Late-early slope differences of the neurons shown in **a**. For each neuron, an early slope was defined  
 311 from  $-11$  to  $-6$  s and a late slope from  $-6$  to  $-1$  s; the difference was computed as (late  $-$  early).  
 312 Differences were evaluated between neuron types (black asterisks, Wilcoxon rank-sum test) and  
 313 relative to zero within each type (gray asterisks, Wilcoxon signed-rank test). Within-type tests were  
 314 Bonferroni-corrected ( $n = 2$ ) ( $*P < 0.05$ ,  $***P < 0.001$ ; N.S.,  $P > 0.05$ ).

315 **d**, Mean firing rates (mean  $\pm$  s.e.m.) of increase- and decrease-type neurons aligned to the trial-start-  
 316 cue, utilizing the same BIG-block rewarded trials and neurons as in **a**.

317 **e**, Baseline-subtracted trial-start-cue-evoked responses (0 to 0.2 s after cue onset; black bar in **d**) for  
 318 the same neurons as in **a**. For each neuron, responses were computed as firing rate in the response  
 319 window minus the mean pre-cue firing rate of that neuron ( $-1$  to 0 s relative to trial-start-cue onset),  
 320 averaged across BIG-block rewarded trials. Responses were evaluated across neuron types (black  
 321 asterisks, Wilcoxon rank-sum test) and relative to zero within each type (gray asterisks, Wilcoxon  
 322 signed-rank test). Within-type tests were Bonferroni-corrected ( $n = 2$ ) ( $*P < 0.05$ ,  $***P < 0.001$ ; N.S.,  
 323  $P > 0.05$ ).

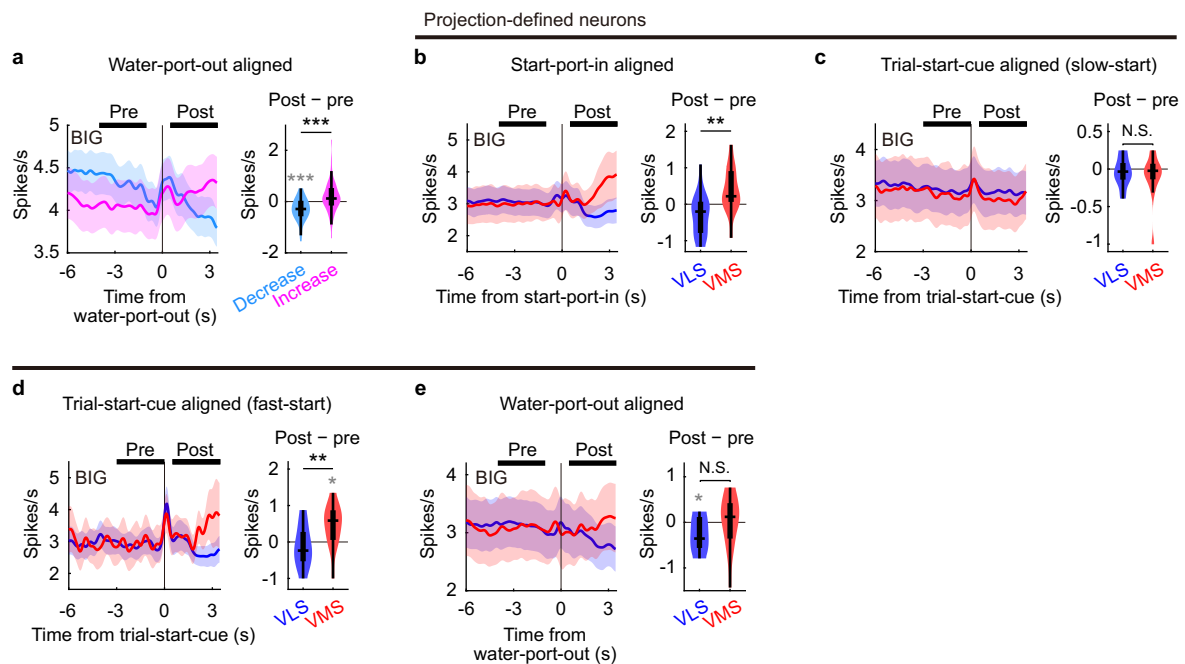

324 **Supplementary Fig. 11 | Activity transitions around behavioral transition points across**  
 325 **dopamine neuron subtypes and projection groups.**

326 **a**, Activity of increase- and decrease-type dopamine neurons aligned to water-port-out in BIG blocks.  
 327 *Left*, mean  $\pm$  s.e.m. firing rates of increase-type ( $n = 56$ ) and decrease-type ( $n = 59$ ) dopamine neurons  
 328 aligned to water-port-out. *Right*, changes in firing rate quantified as Post minus Pre. Post and Pre  
 329 windows were 0.5–3.5 s and –4 to –1 s from water-port-out, respectively.

330 **b–e**, Activity of projection-defined VMS- and VLS-projecting dopamine neurons in BIG blocks  
 331 aligned to start-port-in (**b**), to trial-start-cue onset in slow-start trials (**c**; cue-to-start latency > 1 s), to  
 332 trial-start-cue onset in fast-start trials (**d**; cue-to-start latency < 1 s), and to water-port-out (**e**). *Left*,  
 333 mean  $\pm$  s.e.m. firing rates of VMS-projecting ( $n = 14$ ) and VLS-projecting ( $n = 21$ ) dopamine neurons.  
 334 *Right*, changes in firing rate quantified as Post minus Pre. Post windows were 0.5–3.5 s from start-  
 335 port-in (**b**), trial-start-cue onset (**c,d**), or water-port-out (**e**). Pre windows were –4 to –1 s from start-  
 336 port-in (**b**), –3 to 0 s from trial-start-cue onset (**c,d**), or –4 to –1 s from water-port-out (**e**).

337 Post–Pre values were compared between projection groups (black; Wilcoxon rank-sum tests;  $***P <$   
 338  $0.001$ ,  $**P < 0.01$ ; N.S.,  $P > 0.05$ ) and against zero within each group (gray; Wilcoxon signed-rank  
 339 tests;  $***P < 0.001$ ,  $*P < 0.05$ ; nonsignificant comparisons not shown). Within-group tests were  
 340 Bonferroni-corrected ( $n = 2$ ).

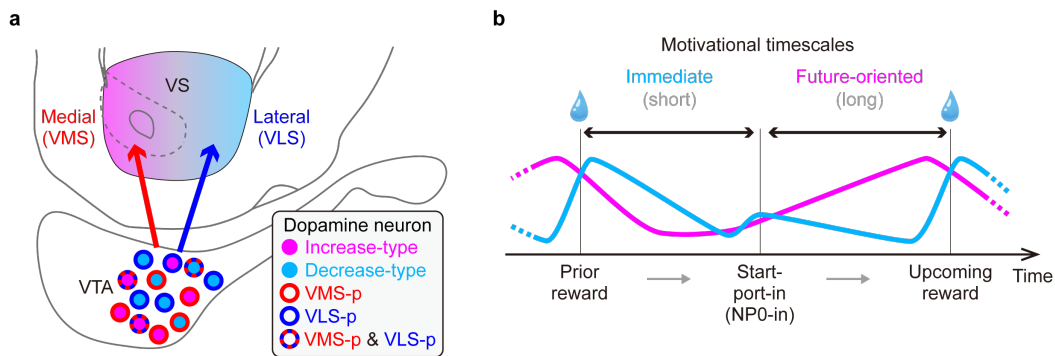

341 **Supplementary Fig. 12 | Schematic summary of projection-biased dopamine neuron**  
342 **subpopulations associated with current reward engagement and next-trial initiation.**

343 **a**, Schematic illustrating projection-biased midbrain dopamine neuron subpopulations in the VTA and  
344 their preferential projections to medial and lateral ventral striatal regions. Magenta and cyan denote  
345 increase- and decrease-type dopamine neurons, respectively. Solid red and blue outlines of schematic  
346 dopamine neurons denote VMS-projecting (VMS-p) and VLS-projecting (VLS-p) neurons,  
347 respectively, whereas dashed red-and-blue outlines denote neurons projecting to both regions. Red and  
348 blue arrows denote projections toward medial and lateral ventral striatal regions, respectively. The  
349 medial and lateral VS regions schematically represent VMS- and VLS-biased projection territories,  
350 respectively. The color gradient indicates partial overlap between these territories. The cyan-to-  
351 magenta gradient indicates that decrease- and increase-type dopamine neuron subpopulations show  
352 partially overlapping but lateral- and medial-biased projections, respectively.

353 **b**, Conceptual diagram illustrating the distinct motivational timescales associated with the two  
354 dopamine response types. Increase-type neurons (magenta) are biased toward signals associated with  
355 preparation for the subsequent reward opportunity. Decrease-type neurons (cyan) are biased toward  
356 engaging with the current reward. The schematic illustrates the behavioral transition from engagement  
357 with the current reward after the prior reward to the start-port-in (NP0-in), which signifies  
358 commitment to the next trial, followed by an approach toward the upcoming reward.

359 VTA, ventral tegmental area; VS, ventral striatum; VMS, ventromedial striatum; VLS, ventrolateral  
360 striatum.

361  
362

363 **References**

364

- 365 1. de Jong, J. W., Liang, Y., Verharen, J. P. H., Fraser, K. M. & Lammel, S. State and rate-of-change  
366 encoding in parallel mesoaccumbal dopamine pathways. *Nat. Neurosci.* **27**, 309–318 (2024).  
367 <https://doi.org/10.1038/s41593-023-01547-6>.
- 368 2. Farassat, N. *et al.* In vivo functional diversity of midbrain dopamine neurons within identified  
369 axonal projections. *eLife* **8**, e48408 (2019). <https://doi.org/10.7554/eLife.48408>.
- 370 3. Zhu, Z. *et al.* Hedonic eating is controlled by dopamine neurons that oppose GLP-1R satiety.  
371 *Science* **387**, eadt0773 (2025). <https://doi.org/10.1126/science.adt0773>.

372
